# Supplementary material
Source: publisher figshare collection journal article supplement (https://tandf.figshare.com/articles/dataset/_/7850735)
Supplement: Supplementary file 1 [file 1]

| <i>Probe ID</i> | <i>chr</i> | <i>pos</i> | <i>strand</i> | <i>Probe_rs</i> | <i>Probe_maf</i> | <i>Relation_to_Island</i> | <i>Gencode_Group</i> | <i>Gencode_NAME</i> | <i>Rate of change in PD</i> | <i>Rate pvalue</i> | <i>Rate of change in aging</i> | <i>Age_pvalue</i> |
|-----------------|------------|------------|---------------|-----------------|------------------|---------------------------|----------------------|---------------------|-----------------------------|--------------------|--------------------------------|-------------------|
| cg26275301      | chr17      | 81041828   | -             | NA              | NA               | N_Shore                   | 5'UTR                | METRNL              | -0.006042159                | 7.56E-08           | -0.00026243                    | 0.6930983         |
| cg07856430      | chr18      | 42339206   | -             | NA              | NA               | OpenSea                   |                      |                     | -0.005249361                | 8.67E-09           | -0.000575371                   | 0.28536872        |
| cg13153353      | chr7       | 4175865    | -             | NA              | NA               | OpenSea                   | 5'UTR                | SDK1                | -0.005235227                | 5.43E-08           | 0.002441848                    | 2.30E-05          |
| cg03565777      | chr12      | 125028339  | +             | NA              | NA               | Island                    |                      | NCOR2               | -0.005083594                | 8.40E-08           | -0.002755874                   | 1.38E-06          |
| cg24136431      | chr19      | 47016623   | -             | NA              | NA               | N_Shore                   |                      |                     | -0.003918999                | 6.40E-08           | -0.000451492                   | 0.2927228         |
| cg16655626      | chr19      | 45886078   | +             | NA              | NA               | S_Shore                   |                      |                     | -0.003341495                | 2.46E-09           | 0.000108102                    | 0.74322037        |
| cg04843111      | chr1       | 156617074  | +             | NA              | NA               | S_Shore                   | 3'UTR                | BCAN                | -0.003278076                | 1.00E-09           | 0.0001516                      | 0.63104077        |
| cg08988821      | chr7       | 74075293   | -             | NA              | NA               | S_Shelf                   | 5'UTR                | GTF2I               | -0.003258618                | 4.22E-08           | -0.000947205                   | 0.00733437        |
| cg01791421      | chr1       | 19996240   | +             | NA              | NA               | S_Shelf                   |                      |                     | -0.003090556                | 8.38E-08           | -0.001052354                   | 0.00219256        |
| cg13994376      | chr13      | 112554122  | -             | NA              | NA               | OpenSea                   | TSS200               | LINC00354           | -0.002924543                | 1.25E-08           | 4.91E-05                       | 0.8713426         |
| cg15987655      | chr5       | 139196457  | -             | NA              | NA               | OpenSea                   |                      |                     | -0.002775707                | 5.86E-08           | 0.000111941                    | 0.71161153        |
| cg03389720      | chr16      | 8780048    | -             | NA              | NA               | OpenSea                   | 5'UTR                | ABAT                | -0.002765818                | 2.00E-08           | -0.000910851                   | 0.00188446        |
| cg15765398      | chr21      | 46409994   | +             | NA              | NA               | N_Shore                   | 3'UTR                | LINC00163           | -0.00271757                 | 5.57E-09           | 0.000116137                    | 0.67268126        |
| cg09750643      | chr11      | 1718086    | +             | NA              | NA               | S_Shelf                   | TSS1500              | KRTAP5-6            | -0.002571389                | 8.04E-09           | -0.000218152                   | 0.40703827        |
| cg06192447      | chr11      | 18815245   | -             | NA              | NA               | S_Shore                   | TSS1500              | PTPN5               | -0.002506904                | 3.24E-08           | -0.000223307                   | 0.40499346        |
| cg15298173      | chr15      | 29903900   | -             | NA              | NA               | OpenSea                   | TSS1500              | RP11-300A12.2       | -0.002464355                | 1.12E-08           | -7.14E-05                      | 0.7791457         |
| cg21470704      | chr2       | 72076889   | +             | NA              | NA               | N_Shelf                   |                      |                     | -0.002315904                | 1.23E-08           | 5.04E-05                       | 0.83381352        |
| cg04551581      | chr18      | 44226771   | -             | NA              | NA               | OpenSea                   |                      |                     | -0.00229512                 | 9.71E-08           | -0.000410956                   | 0.10739683        |
| cg11888769      | chr7       | 149427921  | +             | rs67657627      | 0.125801         | OpenSea                   | 5'UTR                | KRBA1               | -0.002168351                | 8.34E-08           | -0.000652518                   | 0.0067046         |
| cg19441317      | chr3       | 123512314  | -             | NA              | NA               | OpenSea                   |                      | MYLK                | -0.002131418                | 9.09E-08           | -0.000597643                   | 0.01172304        |
| cg00178928      | chr2       | 233366275  | -             | NA              | NA               | N_Shore                   |                      |                     | -0.001905616                | 6.18E-08           | -0.001354291                   | 2.59E-10          |
| cg22113820      | chr10      | 31043781   | -             | rs10826863      | 0.40458          | OpenSea                   |                      |                     | -0.001891696                | 1.10E-08           | 2.56E-06                       | 0.98955447        |
| cg00097237      | chr7       | 135483974  | -             | rs74387254      | 0.010522         | OpenSea                   | TSS1500              | AC091736.1          | -0.00154722                 | 3.73E-08           | 0.000150451                    | 0.36560916        |
| cg15680713      | chr6       | 138129292  | -             | NA              | NA               | OpenSea                   |                      |                     | 0.000631707                 | 9.73E-08           | 0.000274686                    | 0.00010653        |
| cg14519501      | chr12      | 125588923  | -             | NA              | NA               | OpenSea                   | TSS1500              | AACS                | 0.000633717                 | 7.88E-08           | 0.000243172                    | 0.00055462        |
| cg27467060      | chr15      | 51619477   | +             | NA              | NA               | OpenSea                   | 5'UTR                | CYP19A1             | 0.000656436                 | 9.62E-08           | 0.000284184                    | 0.00011334        |
| cg08554114      | chr14      | 53163204   | -             | rs79063259      | 0.021267         | S_Shore                   | TSS1500              | ERO1L               | 0.000671337                 | 3.67E-08           | 0.000105969                    | 0.14210334        |
| cg12218774      | chr17      | 466113     | -             | NA              | NA               | OpenSea                   | 3'UTR                | VPS53               | 0.000684128                 | 9.04E-08           | 0.000353414                    | 4.31E-06          |
| cg03479204      | chr13      | 114193155  | -             | NA              | NA               | N_Shelf                   |                      | TMCO3               | 0.000685934                 | 8.13E-08           | 0.000240662                    | 0.00158896        |
| cg12206165      | chr12      | 123261045  | +             | NA              | NA               | OpenSea                   | TSS200               | CCDC62              | 0.000692155                 | 1.63E-08           | 0.000169182                    | 0.01987393        |
| cg13492553      | chr16      | 78626007   | -             | NA              | NA               | OpenSea                   |                      | WWOX                | 0.000693058                 | 9.05E-08           | 0.000202643                    | 0.00859923        |
| cg17947181      | chr3       | 150967900  | -             | rs3846072       | 0.499206         | OpenSea                   | TSS1500              | P2RY14              | 0.000698812                 | 9.18E-08           | 5.62E-05                       | 0.46774794        |
| cg24320937      | chr11      | 48118658   | -             | NA              | NA               | OpenSea                   | 5'UTR                | PTPRJ               | 0.000699343                 | 5.28E-08           | 0.000295808                    | 0.00011763        |
| cg04363087      | chr5       | 166952198  | +             | rs7715770       | 0.047141         | OpenSea                   |                      |                     | 0.000699988                 | 5.75E-08           | 0.000242307                    | 0.00161391        |
| cg02933742      | chr12      | 53906475   | +             | NA              | NA               | OpenSea                   | 3'UTR                | ATF7                | 0.000702788                 | 7.89E-08           | 0.000271316                    | 0.00051398        |
| cg13799782      | chr1       | 32635542   | -             | NA              | NA               | OpenSea                   | TSS1500              | KPNA6               | 0.000705297                 | 6.68E-08           | 0.000275416                    | 0.00041156        |
| cg00535785      | chr16      | 49766785   | +             | NA              | NA               | OpenSea                   | 5'UTR                | ZNF423              | 0.000705749                 | 3.35E-08           | 0.000204749                    | 0.00700383        |
| cg04670832      | chr14      | 55305927   | +             | NA              | NA               | OpenSea                   |                      |                     | 0.000706427                 | 4.74E-08           | 0.00018678                     | 0.01503936        |
| cg09915377      | chr7       | 97821499   | +             | NA              | NA               | N_Shore                   |                      |                     | 0.000706752                 | 3.81E-08           | 0.000193267                    | 0.01133106        |
| cg06708390      | chr8       | 141210798  | +             | NA              | NA               | OpenSea                   |                      | TRAPPC9             | 0.000709529                 | 4.17E-08           | 0.000253799                    | 0.00099416        |
| cg12120430      | chr3       | 187935971  | -             | NA              | NA               | OpenSea                   | 5'UTR                | LPP                 | 0.000713659                 | 8.60E-08           | 0.000237879                    | 0.00273188        |
| cg00125451      | chr14      | 103345885  | +             | NA              | NA               | OpenSea                   | TSS200               | AL117209.1          | 0.000716518                 | 9.71E-08           | 0.000237519                    | 0.00300213        |
| cg05548619      | chr8       | 120903561  | -             | rs10955941      | 0.394453         | OpenSea                   | TSS200               | RN5S277             | 0.000717639                 | 7.88E-08           | 0.000108612                    | 0.1701919         |
| cg08670289      | chr12      | 70027131   | +             | NA              | NA               | OpenSea                   |                      |                     | 0.000718216                 | 2.22E-08           | 0.000247156                    | 0.00121771        |
| cg04547087      | chr11      | 111600700  | +             | NA              | NA               | OpenSea                   | 3'UTR                | SIK2                | 0.000727653                 | 1.66E-08           | 0.000210336                    | 0.00599254        |
| cg01193174      | chr15      | 70028266   | -             | NA              | NA               | OpenSea                   |                      |                     | 0.000728403                 | 5.28E-08           | 0.000191449                    | 0.0160239         |
| cg02399458      | chr12      | 3209481    | -             | NA              | NA               | OpenSea                   | 5'UTR                | TSPAN9              | 0.000728704                 | 6.91E-08           | 0.000323649                    | 6.25E-05          |
| cg08115239      | chr2       | 113539246  | -             | rs20540         | 0.020469         | OpenSea                   |                      |                     | 0.00072944                  | 3.98E-09           | 0.000161285                    | 0.02777442        |
| cg26174326      | chr6       | 26016674   | +             | NA              | NA               | N_Shelf                   |                      |                     | 0.000735111                 | 2.44E-08           | 0.000215549                    | 0.00589723        |
| cg05905168      | chr6       | 42159186   | +             | rs4714576       | 0.401457         | OpenSea                   |                      |                     | 0.000737259                 | 8.66E-08           | 0.000118382                    | 0.14702107        |

|            |       |           |   |             |          |         |         |               |             |          |             |            |
|------------|-------|-----------|---|-------------|----------|---------|---------|---------------|-------------|----------|-------------|------------|
| cg23849201 | chr12 | 3833996   | - | NA          | NA       | OpenSea | 5'UTR   | EFCAB4B       | 0.000738768 | 1.65E-08 | 0.000306435 | 8.76E-05   |
| cg07132187 | chr10 | 130300318 | + | NA          | NA       | S_Shore |         |               | 0.000739852 | 1.73E-08 | 0.000239309 | 0.00216167 |
| cg27272573 | chr6  | 157479689 | - | rs143941577 | 0.0302   | OpenSea | 5'UTR   | ARID1B        | 0.00074151  | 8.21E-08 | 7.82E-05    | 0.33957752 |
| cg18748888 | chr17 | 76102450  | - | NA          | NA       | S_Shore | 3'UTR   | TNRC6C        | 0.000742777 | 1.43E-08 | 0.000187276 | 0.01587517 |
| cg23491344 | chr16 | 48455243  | - | NA          | NA       | OpenSea | TSS200  | SIAH1         | 0.000743588 | 4.03E-08 | 0.000356622 | 1.12E-05   |
| cg11343643 | chr16 | 89951702  | - | NA          | NA       | OpenSea | TSS1500 | TCF25         | 0.00074361  | 9.42E-08 | 0.000142959 | 0.08363234 |
| cg04788396 | chr11 | 6526878   | + | NA          | NA       | OpenSea |         | FXC1          | 0.000744555 | 2.44E-08 | 0.000109986 | 0.16370504 |
| cg24794298 | chr3  | 187992556 | - | NA          | NA       | OpenSea | 5'UTR   | LPP           | 0.000746976 | 1.16E-08 | 0.000189135 | 0.01479608 |
| cg04509238 | chr1  | 205653625 | + | NA          | NA       | S_Shelf |         |               | 0.000747394 | 5.30E-08 | 0.000280856 | 0.00060713 |
| cg11248473 | chr22 | 31900334  | + | rs5749286   | 0.256492 | OpenSea | 5'UTR   | SFI1          | 0.000751414 | 1.16E-08 | 7.47E-05    | 0.33658555 |
| cg06039049 | chr8  | 125286746 | + | NA          | NA       | OpenSea | 5'UTR   | RP11-383J24.1 | 0.0007538   | 5.60E-08 | 0.000269547 | 0.0011186  |
| cg13151210 | chr13 | 100760826 | - | NA          | NA       | OpenSea | 5'UTR   | PCCA          | 0.000753822 | 6.81E-08 | 0.000220803 | 0.00785508 |
| cg26291678 | chr5  | 33946698  | - | NA          | NA       | OpenSea | 3'UTR   | SLC45A2       | 0.000760456 | 5.33E-08 | 3.83E-05    | 0.64356902 |
| cg03380512 | chr6  | 107960476 | + | NA          | NA       | S_Shelf | 3'UTR   | SOBP          | 0.000760618 | 4.40E-08 | 6.04E-06    | 0.94144157 |
| cg06119874 | chr1  | 207225424 | + | NA          | NA       | N_Shore | TSS1500 | PFKFB2        | 0.000762773 | 5.45E-08 | 0.000187395 | 0.02445167 |
| cg24351767 | chr22 | 29687564  | + | NA          | NA       | OpenSea | ExonBnd | EWSR1         | 0.000765316 | 2.49E-08 | 6.40E-05    | 0.43002476 |
| cg16965890 | chr8  | 48612847  | + | NA          | NA       | OpenSea | 5'UTR   | KIAA0146      | 0.000769026 | 4.23E-08 | 0.000251765 | 0.00256597 |
| cg22995486 | chr5  | 75592299  | + | NA          | NA       | OpenSea | 3'UTR   | RP11-466P24.6 | 0.000773786 | 5.50E-08 | 0.000187474 | 0.02652788 |
| cg00882322 | chr19 | 12242840  | - | NA          | NA       | OpenSea | 3'UTR   | ZNF20         | 0.000775358 | 5.17E-08 | 0.00033051  | 0.00010308 |
| cg14755147 | chr13 | 30984186  | + | NA          | NA       | S_Shore |         |               | 0.000780942 | 6.14E-08 | 0.000176972 | 0.038642   |
| cg03442090 | chr18 | 12759835  | + | NA          | NA       | OpenSea | TSS1500 | Y_RNA         | 0.000780991 | 1.99E-09 | 0.000104282 | 0.17422825 |
| cg17003250 | chr1  | 171313713 | + | rs7518648   | 0.378698 | OpenSea |         |               | 0.00078329  | 5.87E-09 | 0.000276306 | 0.00055455 |
| cg19341210 | chr1  | 45166600  | + | NA          | NA       | OpenSea | ExonBnd | C1orf228      | 0.000789438 | 6.51E-08 | 5.02E-05    | 0.56122769 |
| cg26346441 | chr14 | 74752123  | - | rs10141723  | 0.015008 | OpenSea |         |               | 0.000789677 | 9.22E-08 | -5.55E-06   | 0.94943129 |
| cg05264881 | chr1  | 15375148  | - | rs140940258 | 0.0389   | Island  |         | KAZN          | 0.00078977  | 7.38E-08 | 0.00024788  | 0.00453314 |
| cg04647176 | chr12 | 341431    | + | NA          | NA       | OpenSea |         | SLC6A13       | 0.000790323 | 3.90E-08 | 0.000332625 | 0.00010844 |
| cg09181437 | chr20 | 30670099  | + | NA          | NA       | OpenSea |         | HCK           | 0.000790785 | 2.77E-08 | 0.000202438 | 0.01653016 |
| cg01009828 | chr18 | 77170050  | - | rs182507    | 0.259209 | N_Shore | TSS200  | NFATC1        | 0.000791898 | 4.06E-08 | 0.000187801 | 0.0282399  |
| cg04283000 | chr13 | 113472466 | - | rs114725822 | 0.013467 | Island  | 5'UTR   | ATP11A        | 0.000798332 | 9.73E-08 | 0.000295766 | 0.00092884 |
| cg16398541 | chr5  | 168232518 | + | NA          | NA       | OpenSea |         | SLIT3         | 0.000808494 | 5.60E-08 | 0.000216574 | 0.01431079 |
| cg16243832 | chr7  | 129593276 | + | NA          | NA       | S_Shore | TSS1500 | UBE2H         | 0.000811437 | 1.32E-08 | 0.000155636 | 0.06542006 |
| cg05362168 | chr16 | 67562128  | + | NA          | NA       | N_Shore | 3'UTR   | FAM65A        | 0.000812146 | 1.62E-08 | 0.000444822 | 2.72E-07   |
| cg20167539 | chr6  | 161995302 | - | rs73593483  | 0.025137 | OpenSea |         |               | 0.000814122 | 1.95E-08 | 6.34E-05    | 0.45921546 |
| cg07280194 | chr5  | 55198902  | - | NA          | NA       | OpenSea |         |               | 0.000820984 | 1.72E-08 | 0.000240907 | 0.00533192 |
| cg09394127 | chr2  | 33710870  | + | NA          | NA       | OpenSea | 5'UTR   | RASGRP3       | 0.000822818 | 2.74E-09 | 0.00012772  | 0.11770905 |
| cg06741485 | chr16 | 8348317   | + | NA          | NA       | OpenSea | TSS200  | RP11-279O17.1 | 0.000822863 | 2.60E-08 | 0.000234418 | 0.00757622 |
| cg18509435 | chr18 | 59157879  | - | rs35676425  | 0.01282  | OpenSea | 1stExon | CDH20         | 0.000826589 | 9.80E-09 | 0.000101499 | 0.23321122 |
| cg01123353 | chr3  | 127394884 | - | NA          | NA       | S_Shelf | 5'UTR   | ABTB1         | 0.000828825 | 4.43E-08 | 0.000411715 | 5.86E-06   |
| cg19657945 | chr8  | 144367392 | + | NA          | NA       | S_Shore |         |               | 0.00083271  | 9.64E-08 | 0.000317156 | 0.00066454 |
| cg03423221 | chr7  | 148484185 | - | NA          | NA       | S_Shelf |         |               | 0.000836172 | 3.19E-08 | 0.000207286 | 0.02082845 |
| cg16590368 | chr22 | 42769079  | - | NA          | NA       | S_Shelf |         |               | 0.000836749 | 2.16E-08 | 0.000196114 | 0.02683605 |
| cg21147944 | chr13 | 114264438 | - | NA          | NA       | S_Shelf | 5'UTR   | TFDP1         | 0.000838567 | 7.09E-08 | 0.000221133 | 0.01675369 |
| cg02137421 | chr17 | 65442474  | - | NA          | NA       | OpenSea |         |               | 0.000842543 | 9.97E-08 | 0.000121548 | 0.19470717 |
| cg20360928 | chr2  | 61191582  | - | NA          | NA       | OpenSea |         |               | 0.000843425 | 8.46E-09 | 0.000121589 | 0.15991177 |
| cg19848599 | chr5  | 131658161 | - | NA          | NA       | OpenSea | 3'UTR   | AC034220.3    | 0.000843746 | 9.95E-08 | 0.000244436 | 0.00945959 |
| cg02227853 | chr17 | 7283176   | + | NA          | NA       | N_Shore | TSS1500 | TNK1          | 0.000844052 | 6.97E-08 | 0.000177494 | 0.05593927 |
| cg13765345 | chr11 | 64131561  | - | NA          | NA       | OpenSea |         | RPS6KA4       | 0.000845367 | 6.52E-08 | 0.000306542 | 0.0010122  |
| cg26837844 | chr16 | 28969861  | - | NA          | NA       | OpenSea | 3'UTR   | NFATC2IP      | 0.00084904  | 3.47E-08 | 0.000273993 | 0.0027665  |
| cg27550372 | chr12 | 132286040 | - | rs148631980 | 0.0962   | Island  | TSS200  | RN5S378       | 0.000852972 | 5.22E-08 | 0.00034222  | 0.00025403 |
| cg19204189 | chr12 | 1973208   | + | NA          | NA       | N_Shore |         | CACNA2D4      | 0.00085897  | 6.29E-08 | 0.000112065 | 0.23325931 |
| cg08287211 | chr10 | 134535631 | + | NA          | NA       | N_Shore | 5'UTR   | INPP5A        | 0.000861445 | 2.62E-08 | 0.000156565 | 0.08756413 |

|            |       |           |   |             |          |         |         |          |             |          |              |            |
|------------|-------|-----------|---|-------------|----------|---------|---------|----------|-------------|----------|--------------|------------|
| cg02205853 | chr7  | 6509628   | - | NA          | NA       | OpenSea | 3'UTR   | KDELR2   | 0.000862003 | 8.61E-08 | 6.21E-05     | 0.51443959 |
| cg09581935 | chr10 | 114591707 | - | NA          | NA       | OpenSea |         |          | 0.000867944 | 9.32E-08 | 5.17E-05     | 0.59104754 |
| cg11668715 | chr11 | 8713919   | - | NA          | NA       | S_Shelf | TSS1500 | RPL27A   | 0.000879971 | 7.61E-08 | 0.000262086  | 0.00709814 |
| cg06264868 | chr10 | 778709    | - | NA          | NA       | OpenSea |         |          | 0.00088052  | 3.08E-08 | 0.000279326  | 0.0031404  |
| cg09068520 | chr17 | 3374904   | + | NA          | NA       | N_Shore | 5'UTR   | SPATA22  | 0.00088285  | 6.21E-08 | 0.000143298  | 0.1381284  |
| cg25283432 | chr12 | 125282561 | + | NA          | NA       | OpenSea | 3'UTR   | SCARB1   | 0.000883812 | 3.17E-08 | 0.000666121  | 8.86E-12   |
| cg00447581 | chr3  | 52724578  | + | NA          | NA       | OpenSea | TSS1500 | SNORD19  | 0.000893566 | 3.34E-08 | 0.000206944  | 0.03102243 |
| cg04110832 | chr13 | 20439524  | + | NA          | NA       | S_Shore |         |          | 0.000903147 | 2.87E-08 | 0.000147489  | 0.12575337 |
| cg17326403 | chr5  | 645659    | - | NA          | NA       | N_Shore | 3'UTR   | CEP72    | 0.000908502 | 4.00E-08 | 0.000263556  | 0.0073459  |
| cg18744234 | chr6  | 35422526  | - | NA          | NA       | S_Shore |         |          | 0.000917231 | 5.35E-08 | 0.000305919  | 0.00230977 |
| cg11610925 | chr10 | 134978049 | - | rs60280897  | 0.016    | Island  |         | KNDC1    | 0.000926966 | 1.54E-08 | 0.000144005  | 0.13720157 |
| cg14547519 | chr9  | 88168431  | + | NA          | NA       | OpenSea | 3'UTR   | AGTPBP1  | 0.000930179 | 8.35E-09 | 6.21E-05     | 0.5146575  |
| cg19452754 | chr3  | 58487342  | - | NA          | NA       | OpenSea |         |          | 0.000934114 | 8.63E-08 | 0.000373538  | 0.00033784 |
| cg08927260 | chr10 | 15254823  | + | NA          | NA       | Island  | 3'UTR   | FAM171A1 | 0.000935569 | 6.92E-08 | 0.000275724  | 0.00751797 |
| cg10382148 | chr1  | 209954182 | - | NA          | NA       | N_Shelf | TSS200  | TRAF3IP3 | 0.000948667 | 6.41E-08 | 0.000146557  | 0.15854473 |
| cg17644611 | chr8  | 17549768  | + | NA          | NA       | OpenSea | TSS200  | MTUS1    | 0.000956574 | 4.09E-10 | 0.000100984  | 0.26174419 |
| cg04953297 | chr21 | 43983837  | - | rs17115131  | 0.053977 | OpenSea |         |          | 0.00096325  | 6.88E-08 | 0.000214985  | 0.04245849 |
| cg06138257 | chr12 | 133417190 | - | NA          | NA       | N_Shore | 3'UTR   | CHFR     | 0.001002379 | 4.56E-08 | 0.000202427  | 0.06249635 |
| cg00988841 | chr10 | 134556463 | - | NA          | NA       | S_Shore | 3'UTR   | INPP5A   | 0.001010991 | 4.24E-08 | 0.000138453  | 0.20480325 |
| cg26112799 | chr13 | 111893471 | - | NA          | NA       | OpenSea | TSS200  | ARHGEF7  | 0.001015567 | 7.93E-08 | 3.46E-05     | 0.7575847  |
| cg16168885 | chr1  | 179548211 | - | NA          | NA       | S_Shelf |         |          | 0.001042938 | 1.07E-08 | 2.87E-06     | 0.97875738 |
| cg22071610 | chr22 | 24086732  | - | NA          | NA       | OpenSea |         |          | 0.001047157 | 6.45E-09 | 4.07E-05     | 0.7018494  |
| cg01202950 | chr15 | 74943647  | + | rs111225867 | 0.043916 | OpenSea |         | EDC3     | 0.001056883 | 6.20E-09 | 0.000266543  | 0.01333317 |
| cg21509981 | chr4  | 17692765  | + | rs4698649   | 0.343234 | OpenSea |         |          | 0.00107451  | 8.07E-08 | 3.18E-05     | 0.78846383 |
| cg20397902 | chr16 | 88624807  | - | rs4496126   | 0.142726 | Island  |         |          | 0.001089257 | 1.06E-08 | 0.000320403  | 0.00457588 |
| cg15475168 | chr7  | 101860421 | + | NA          | NA       | OpenSea |         |          | 0.001147367 | 1.16E-08 | 7.50E-05     | 0.52741524 |
| cg08561469 | chr16 | 81944150  | + | NA          | NA       | OpenSea |         | PLCG2    | 0.001163379 | 3.38E-09 | 2.16E-05     | 0.85241727 |
| cg10401356 | chr8  | 140712424 | + | NA          | NA       | N_Shelf |         |          | 0.001226298 | 1.11E-08 | 0.00015833   | 0.21187535 |
| cg18496624 | chr17 | 38094692  | + | NA          | NA       | OpenSea |         |          | 0.001229382 | 5.44E-09 | -4.56E-05    | 0.71367622 |
| cg09593391 | chr8  | 144737908 | - | NA          | NA       | OpenSea | 3'UTR   | ZNF623   | 0.001263201 | 9.53E-08 | -0.000183212 | 0.19162524 |
| cg14946911 | chr20 | 56772325  | + | NA          | NA       | OpenSea |         |          | 0.001284874 | 2.24E-09 | 5.74E-05     | 0.64989287 |
| cg05933219 | chr2  | 240099221 | + | NA          | NA       | N_Shore | 5'UTR   | HDAC4    | 0.001339416 | 5.61E-08 | -0.000143707 | 0.3248869  |
| cg15540764 | chr7  | 36919658  | - | NA          | NA       | OpenSea |         | ELMO1    | 0.001396622 | 7.33E-08 | -0.000399435 | 0.00960889 |
| cg25979148 | chr4  | 871629    | + | rs1564280   | 0.189263 | Island  |         |          | 0.002100383 | 2.55E-08 | -7.54E-05    | 0.73496238 |
| cg06688960 | chr20 | 1504932   | + | NA          | NA       | OpenSea |         |          | 0.007134196 | 1.04E-09 | 0.000442397  | 0.52011158 |
| cg26126295 | chr4  | 119095240 | + | NA          | NA       | OpenSea |         |          | 0.007752004 | 1.78E-08 | 0.003396985  | 3.64E-05   |
| cg17046825 | chr13 | 21081216  | - | rs7336556   | 0.49437  | OpenSea |         |          | 0.008339113 | 5.35E-08 | -0.003113454 | 0.00066035 |

Rate of change expressed as % Beta units/ year.
