# Supplementary material
Source: publisher figshare collection journal article supplement (https://tandf.figshare.com/articles/dataset/_/7850735)
Supplement: Supplementary file 2 [file 1]

| Probe ID   | chr   | Position  | strand | Probe_rs    | Probe_maf | Relation ot 1 | Gene ID    | logFC      | P.Value  | adj.P.Val  |
|------------|-------|-----------|--------|-------------|-----------|---------------|------------|------------|----------|------------|
| cg06889422 | chr22 | 24627294  | -      | NA          | NA        |               |            | -0.2838489 | 1.28E-08 | 0.00390793 |
| cg16133681 | chr12 | 25801621  | -      | NA          | NA        | TSS200        | IFLTD1     | -0.3861918 | 1.54E-08 | 0.00390793 |
| cg26524067 | chr12 | 133003928 | -      | rs184106038 | 0.4235    |               |            | -0.4967074 | 1.55E-08 | 0.00390793 |
| cg09994891 | chr10 | 2173024   | -      | NA          | NA        |               |            | 0.31875411 | 1.31E-07 | 0.02481612 |
| cg11408952 | chr13 | 48892244  | -      | NA          | NA        |               | RB1        | 0.48620291 | 1.72E-07 | 0.02598706 |
| cg12724357 | chr11 | 66790285  | -      | NA          | NA        | TSS1500       | SYT12      | 0.24073789 | 2.79E-07 | 0.03512305 |
| cg08098382 | chr19 | 3869345   | -      | NA          | NA        | TSS1500       | ZFR2       | 0.30684743 | 4.35E-07 | 0.04698464 |
| cg23979954 | chr12 | 25801601  | -      | NA          | NA        | TSS200        | IFLTD1     | -0.3055472 | 6.65E-07 | 0.06233111 |
| cg18279536 | chr14 | 101194748 | +      | NA          | NA        | ExonBnd       | DLK1       | 0.18266745 | 8.04E-07 | 0.06233111 |
| cg10405605 | chr10 | 6188149   | -      | rs4747891   | 0.089498  | TSS200        | PFKFB3     | 0.15204739 | 8.24E-07 | 0.06233111 |
| cg04741728 | chr12 | 133003907 | -      | rs28619310  | 0.449726  |               |            | -0.5944495 | 1.17E-06 | 0.07678765 |
| cg20787649 | chr1  | 17636898  | -      | rs4920591   | 0.000615  |               |            | 0.52986799 | 1.22E-06 | 0.07678765 |
| cg03681383 | chr12 | 25801522  | -      | rs115034942 | 0.015639  | TSS200        | IFLTD1     | -0.3044045 | 1.56E-06 | 0.09074165 |
| cg12342048 | chr19 | 11465311  | +      | rs6887      | 0.380857  | TSS1500       | AC024575.1 | -0.2471161 | 2.16E-06 | 0.10812077 |
| cg19628497 | chr14 | 101194267 | +      | NA          | NA        |               | DLK1       | 0.20548297 | 2.22E-06 | 0.10812077 |
| cg13211181 | chr12 | 25801455  | -      | NA          | NA        | 1stExon       | IFLTD1     | -0.2677317 | 2.52E-06 | 0.10812077 |
| cg00515755 | chr19 | 1005248   | -      | rs2240158   | 0.386931  |               |            | 0.20412799 | 2.57E-06 | 0.10812077 |
| cg11469325 | chr10 | 75012359  | -      | rs11538567  | 0.014168  | 3'UTR         | MRPS16     | -0.2990455 | 2.57E-06 | 0.10812077 |
| cg04224786 | chr8  | 144222401 | -      | rs13275874  | 0.274149  |               |            | 0.2698457  | 3.03E-06 | 0.10956816 |
| cg08766508 | chr13 | 36430582  | -      | NA          | NA        | TSS1500       | DCLK1      | 0.31522131 | 3.19E-06 | 0.10956816 |
| cg25588820 | chr12 | 108070383 | -      | NA          | NA        |               |            | -0.2781048 | 3.19E-06 | 0.10956816 |
| cg12127149 | chr14 | 102487020 | +      | NA          | NA        |               | DYNC1H1    | 0.09433358 | 3.24E-06 | 0.10956816 |
| cg05763097 | chr14 | 103569340 | -      | rs76657117  | 0.254803  |               | EXOC3L4    | 0.29651498 | 3.33E-06 | 0.10956816 |
| cg01181415 | chr12 | 16757954  | -      | NA          | NA        | 5'UTR         | LMO3       | -0.1399181 | 3.68E-06 | 0.11263202 |
| cg18121862 | chr14 | 101195312 | -      | NA          | NA        |               |            | 0.15255381 | 3.72E-06 | 0.11263202 |
| cg13315147 | chr10 | 135341528 | -      | NA          | NA        | TSS200        | CYP2E1     | 0.3555005  | 4.02E-06 | 0.11704691 |
| cg18397450 | chr14 | 105830631 | -      | NA          | NA        |               | PACS2      | -0.3802116 | 4.56E-06 | 0.12201112 |
| cg21435367 | chr3  | 133574742 | +      | NA          | NA        |               | RAB6B      | -0.2516249 | 4.80E-06 | 0.12201112 |
| cg15756507 | chr17 | 65471461  | +      | NA          | NA        |               |            | 0.13906733 | 5.05E-06 | 0.12201112 |
| cg04513422 | chr13 | 111522314 | +      | NA          | NA        | TSS200        | LINC00346  | -0.325847  | 5.18E-06 | 0.12201112 |
| cg23629724 | chr6  | 34099284  | -      | rs57899596  | 0.057776  |               |            | 0.14777734 | 5.23E-06 | 0.12201112 |
| cg07458516 | chr1  | 43854839  | -      | NA          | NA        | 5'UTR         | MED8       | 0.12451808 | 5.25E-06 | 0.12201112 |
| cg13096592 | chr8  | 144222103 | -      | NA          | NA        |               |            | 0.17849653 | 5.32E-06 | 0.12201112 |
| cg17793767 | chr20 | 29962878  | -      | NA          | NA        | TSS1500       | SNORA40    | 0.25805797 | 5.72E-06 | 0.12441319 |
| cg25930440 | chr8  | 144222338 | +      | rs13275874  | 0.274149  |               |            | 0.23997803 | 5.75E-06 | 0.12441319 |
| cg14598338 | chr9  | 96623480  | +      | NA          | NA        |               |            | -0.2480189 | 6.23E-06 | 0.1309708  |
| cg12042203 | chr8  | 144222455 | -      | NA          | NA        |               |            | 0.31229032 | 6.74E-06 | 0.13778532 |
| cg02470697 | chr2  | 48844916  | +      | NA          | NA        | TSS200        | GTF2A1L    | -0.5145367 | 8.03E-06 | 0.15997103 |
| cg03493774 | chr14 | 92879474  | -      | NA          | NA        | 5'UTR         | SLC24A4    | -0.1643205 | 8.71E-06 | 0.16898971 |
| cg03181524 | chr19 | 39048014  | +      | NA          | NA        |               |            | -0.2383631 | 9.50E-06 | 0.17554691 |
| cg11321092 | chr5  | 144325284 | -      | NA          | NA        |               |            | -0.2466138 | 9.59E-06 | 0.17554691 |
| cg08842546 | chr4  | 72416734  | +      | NA          | NA        |               |            | -0.1837002 | 9.83E-06 | 0.17554691 |
| cg26393630 | chr14 | 30399576  | +      | NA          | NA        |               |            | -0.1477158 | 1.01E-05 | 0.17554691 |
| cg00440531 | chr3  | 137478664 | -      | NA          | NA        |               |            | 0.36669948 | 1.02E-05 | 0.17554691 |
| cg01691592 | chr12 | 25801556  | -      | NA          | NA        | TSS200        | IFLTD1     | -0.2675638 | 1.09E-05 | 0.18333659 |
| cg15489593 | chr17 | 76010131  | +      | NA          | NA        | 5'UTR         | TNRC6C     | 0.66549886 | 1.17E-05 | 0.18719925 |
| cg17270519 | chr12 | 132923339 | -      | NA          | NA        |               |            | -0.2533824 | 1.20E-05 | 0.18719925 |
| cg17650274 | chr20 | 25064127  | +      | NA          | NA        | TSS1500       | VSX1       | 0.22602265 | 1.23E-05 | 0.18719925 |
| cg00797407 | chr20 | 23113340  | +      | NA          | NA        | TSS200        | RP4-737E23 | -0.1415542 | 1.24E-05 | 0.18719925 |
| cg24668570 | chr10 | 134973778 | +      | NA          | NA        | TSS200        | KNDC1      | -0.5028086 | 1.24E-05 | 0.18719925 |
| cg23487297 | chr6  | 160522792 | -      | NA          | NA        |               | IGF2R      | 0.19540551 | 1.28E-05 | 0.18719925 |
| cg03134882 | chr10 | 135341463 | -      | rs41299400  | 0.018534  | TSS200        | CYP2E1     | 0.38096443 | 1.29E-05 | 0.18719925 |
| cg22057266 | chr8  | 6786083   | +      | NA          | NA        | TSS200        | GS1-24F4.3 | -0.2496101 | 1.31E-05 | 0.18719925 |
