# Supplementary material
Source: publisher figshare collection journal article supplement (https://tandf.figshare.com/articles/dataset/_/7850735)
Supplement: Supplementary file 3 [file 1]

| Probe_ID   | chr   | pos       | strand | Probe_rs    | Probe_maf | Relation_to_Island | Gencode_Group | Gencode_NAME   | Rate of change in PD Med | Rate pvalue | Rate of change in aging | Age_pvalue |
|------------|-------|-----------|--------|-------------|-----------|--------------------|---------------|----------------|--------------------------|-------------|-------------------------|------------|
| cg13643943 | chr5  | 138629019 | -      | rs62383032  | 0.042505  | N_Shore            | TSS1500       | MATR3          | -0.006323584             | 7.25E-08    | -0.001131953            | 0.10796267 |
| cg08988821 | chr7  | 74075293  | -      | NA          | NA        | S_Shelf            | 5'UTR         | GTF2I          | -0.003962235             | 7.24E-09    | -0.001107556            | 0.00700983 |
| cg16655626 | chr19 | 45886078  | +      | NA          | NA        | S_Shore            |               |                | -0.003729852             | 2.20E-08    | 0.000130903             | 0.74215694 |
| cg14386312 | chr19 | 58740861  | +      | rs114116776 | 0.053866  | S_Shore            | 1stExon       | ZNF544         | -0.003456144             | 2.92E-08    | -0.000958283            | 0.01049514 |
| cg15765398 | chr21 | 46409994  | +      | NA          | NA        | N_Shore            | 3'UTR         | LINC00163      | -0.00344202              | 1.11E-11    | -2.95E-05               | 0.92127496 |
| cg15987655 | chr5  | 139196457 | -      | NA          | NA        | OpenSea            |               |                | -0.003291542             | 1.98E-08    | -0.000182295            | 0.60245357 |
| cg04843111 | chr1  | 156617074 | +      | NA          | NA        | S_Shore            | 3'UTR         | BCAN           | -0.003268374             | 8.26E-08    | -3.51E-05               | 0.92340065 |
| cg14240188 | chr1  | 11621054  | -      | rs61053148  | 0.013266  | OpenSea            |               |                | -0.002803702             | 1.77E-08    | -0.000424647            | 0.15348112 |
| cg04551581 | chr18 | 44226771  | -      | NA          | NA        | OpenSea            |               |                | -0.002731625             | 5.48E-08    | -0.000720245            | 0.01713377 |
| cg15298173 | chr15 | 29903900  | -      | NA          | NA        | OpenSea            | TSS1500       | RP11-300A12.2  | -0.002622497             | 7.18E-08    | -0.00028816             | 0.32285951 |
| cg15202607 | chr5  | 149520120 | -      | rs11738308  | 0.001065  | OpenSea            | 5'UTR         | PDGFRB         | -0.002342129             | 4.44E-08    | -0.000911309            | 0.00043073 |
| cg10429957 | chr5  | 141245719 | +      | NA          | NA        | OpenSea            | 3'UTR         | PCDH1          | -0.001970358             | 8.39E-08    | -0.000685162            | 0.00203077 |
| cg26126295 | chr4  | 119095240 | +      | NA          | NA        | OpenSea            |               |                | -0.008615397             | 8.67E-08    | 0.003698504             | 0.00015235 |
| cg25979148 | chr4  | 871629    | +      | rs1564280   | 0.189263  | Island             |               |                | 0.0025217                | 4.47E-09    | 0.000124838             | 0.62559797 |
| cg10224806 | chr12 | 131188144 | +      | NA          | NA        | Island             | 3'UTR         | RIMBP2         | 0.002211824              | 9.04E-08    | 0.001284769             | 4.18E-07   |
| cg18629514 | chr7  | 5388895   | +      | NA          | NA        | N_Shelf            |               |                | 0.001777258              | 8.06E-08    | 0.000515609             | 0.00973184 |
| cg03501539 | chr11 | 114760598 | +      | NA          | NA        | OpenSea            |               |                | 0.001663884              | 6.57E-08    | 4.58E-05                | 0.80354947 |
| cg15008072 | chr17 | 7440546   | -      | NA          | NA        | OpenSea            | TSS200        | Y_RNA          | 0.001660303              | 7.51E-08    | 0.000768324             | 4.24E-05   |
| cg05933219 | chr2  | 240099221 | +      | NA          | NA        | N_Shore            | 5'UTR         | HDAC4          | 0.001618457              | 1.37E-09    | -0.000144386            | 0.36292769 |
| cg18763089 | chr1  | 1683738   | -      | NA          | NA        | N_Shore            | 3'UTR         | NADK           | 0.001546639              | 1.10E-08    | 0.000335493             | 0.03831804 |
| cg05120150 | chr14 | 105912598 | +      | NA          | NA        | S_Shore            | 5'UTR         | MTA1           | 0.001432839              | 3.80E-08    | 0.000630255             | 6.67E-05   |
| cg16916102 | chr19 | 58429359  | -      | rs7254431   | 0.284672  | S_Shore            | TSS1500       | ZNF417         | 0.001407289              | 9.94E-08    | 0.000972107             | 2.83E-09   |
| cg09593391 | chr8  | 144737908 | -      | NA          | NA        | OpenSea            | 3'UTR         | ZNF623         | 0.001392066              | 8.19E-08    | -0.000125792            | 0.41824927 |
| cg10401356 | chr8  | 140712424 | +      | NA          | NA        | N_Shelf            |               |                | 0.001381448              | 3.24E-09    | 0.00029545              | 0.03403947 |
| cg22511774 | chr13 | 114746915 | +      | rs12428831  | 0.301276  | N_Shore            |               |                | 0.001368442              | 3.27E-08    | 0.000660071             | 1.18E-05   |
| cg24703022 | chr21 | 42815666  | -      | NA          | NA        | OpenSea            | TSS1500       | AP001610.5     | 0.00131592               | 2.56E-08    | 0.000657749             | 4.89E-06   |
| cg03236534 | chr13 | 113417204 | +      | NA          | NA        | N_Shelf            | 5'UTR         | ATP11A         | 0.001313599              | 4.66E-08    | 0.000427696             | 0.00316142 |
| cg09201783 | chr7  | 100171932 | -      | NA          | NA        | Island             | TSS1500       | LRCH4          | 0.001311531              | 7.20E-08    | 0.000483262             | 0.00102549 |
| cg21964637 | chr7  | 150729118 | -      | NA          | NA        | S_Shelf            | TSS1500       | ABCB8          | 0.001306311              | 5.27E-09    | 0.000585776             | 1.56E-05   |
| cg16568314 | chr3  | 195625657 | +      | NA          | NA        | S_Shelf            | 3'UTR         | TNK2           | 0.001302183              | 2.21E-08    | 0.000286723             | 0.03980768 |
| cg22078934 | chr2  | 28905057  | +      | NA          | NA        | OpenSea            |               |                | 0.001299886              | 3.00E-08    | 0.000447225             | 0.00156657 |
| cg11078188 | chr9  | 135417305 | -      | NA          | NA        | OpenSea            |               |                | 0.001298159              | 6.16E-08    | 0.000182753             | 0.20316096 |
| cg06107030 | chr4  | 3799176   | -      | rs28428183  | 0.062129  | OpenSea            |               |                | 0.001296041              | 9.77E-08    | 4.90E-05                | 0.73615905 |
| cg17843487 | chr1  | 15756557  | -      | NA          | NA        | OpenSea            | 3'UTR         | EFHD2          | 0.001285027              | 1.37E-08    | 0.000392787             | 0.00388966 |
| cg24000035 | chr7  | 2120044   | +      | NA          | NA        | S_Shelf            |               | MAD1L1         | 0.001283689              | 5.29E-08    | 0.000239625             | 0.09019132 |
| cg15475168 | chr7  | 101860421 | +      | NA          | NA        | OpenSea            |               |                | 0.001269754              | 1.09E-08    | 0.000102264             | 0.44008873 |
| cg06654275 | chr7  | 72414590  | +      | rs117982312 | 0.020399  | S_Shore            |               |                | 0.001248926              | 3.41E-08    | 0.000308075             | 0.02333887 |
| cg07993239 | chr12 | 92489053  | +      | NA          | NA        | OpenSea            | 3'UTR         | RP11-24B21.1   | 0.001234457              | 7.29E-08    | 0.000313199             | 0.02307179 |
| cg14946911 | chr20 | 56772325  | +      | NA          | NA        | OpenSea            |               |                | 0.001229401              | 6.79E-08    | 1.86E-05                | 0.89148225 |
| cg11238267 | chr11 | 659560    | -      | rs7941038   | 0.240218  | N_Shore            | 3'UTR         | DEAF1          | 0.001217301              | 5.99E-08    | 0.000465192             | 0.00061639 |
| cg09171874 | chr1  | 153520801 | +      | rs28452456  | 0.096861  | OpenSea            | ExonBnd       | S100A3         | 0.001205842              | 9.53E-08    | 0.000479729             | 0.00045686 |
| cg05589396 | chr11 | 68384193  | +      | NA          | NA        | OpenSea            | TSS1500       | CTD-2007L18.5  | 0.001203572              | 6.99E-08    | 0.000455151             | 0.0007476  |
| cg21825040 | chr13 | 40749072  | +      | NA          | NA        | S_Shelf            |               |                | 0.001192443              | 4.22E-08    | 0.000476973             | 0.00029139 |
| cg11192877 | chr12 | 125287607 | +      | rs838909    | 0.490656  | OpenSea            | 3'UTR         | SCARB1         | 0.001184012              | 3.00E-08    | 0.0004476               | 0.00052544 |
| cg22071610 | chr22 | 24086732  | -      | NA          | NA        | OpenSea            |               |                | 0.001176192              | 1.36E-08    | 0.000106963             | 0.38684391 |
| cg01202950 | chr15 | 74943647  | +      | rs111225867 | 0.043916  | OpenSea            |               | EDC3           | 0.001169015              | 3.55E-08    | 0.000247227             | 0.0518558  |
| cg26158621 | chr5  | 179508598 | +      | NA          | NA        | OpenSea            |               |                | 0.001165789              | 8.62E-08    | 0.00019388              | 0.13758976 |
| cg17045635 | chr10 | 80998130  | -      | NA          | NA        | N_Shelf            |               |                | 0.001154817              | 5.24E-08    | 0.000476507             | 0.00020951 |
| cg26888356 | chr10 | 118154544 | -      | NA          | NA        | OpenSea            |               |                | 0.001145126              | 6.69E-08    | 0.000116215             | 0.35994744 |
| cg08833010 | chr4  | 1684739   | +      | NA          | NA        | N_Shore            | 5'UTR         | FAM53A         | 0.00113815               | 7.75E-08    | -4.42E-06               | 0.97215818 |
| cg04953297 | chr21 | 43983837  | -      | rs17115131  | 0.053977  | OpenSea            |               |                | 0.001134786              | 5.96E-09    | 0.000300446             | 0.01014231 |
| cg23673980 | chr7  | 5641966   | +      | NA          | NA        | N_Shore            | TSS1500       | FSCN1          | 0.001125579              | 4.42E-08    | 0.000383199             | 0.00200588 |
| cg21565078 | chr2  | 241069202 | +      | NA          | NA        | Island             |               |                | 0.001122751              | 8.23E-09    | 0.000441695             | 0.00017345 |
| cg20397902 | chr16 | 88624807  | -      | rs4496126   | 0.142726  | Island             |               |                | 0.001119754              | 3.73E-08    | 0.000336149             | 0.00604658 |
| cg05429094 | chr16 | 1677598   | -      | NA          | NA        | S_Shore            | TSS1500       | LA16c-395F10.1 | 0.001115936              | 7.05E-08    | 0.000461353             | 0.00023606 |
| cg17948897 | chr4  | 7277180   | -      | rs73206467  | 0.137376  | OpenSea            |               |                | 0.001109888              | 8.91E-08    | 0.000196134             | 0.11515165 |
| cg20346616 | chr7  | 5205257   | +      | NA          | NA        | OpenSea            |               |                | 0.00110454               | 5.53E-08    | 0.000398787             | 0.00116268 |
| cg06644978 | chr18 | 73202039  | +      | NA          | NA        | OpenSea            |               |                | 0.001101161              | 7.28E-08    | 0.000524285             | 2.53E-05   |
| cg07815878 | chr4  | 184872086 | -      | NA          | NA        | OpenSea            | 5'UTR         | STOX2          | 0.001098052              | 6.24E-08    | 0.000349852             | 0.00422727 |
| cg21268223 | chr1  | 45988910  | -      | NA          | NA        | S_Shore            | TSS1500       | PRDX1          | 0.001094756              | 6.56E-08    | 0.000338371             | 0.00557875 |
| cg01466631 | chr17 | 1094369   | +      | NA          | NA        | OpenSea            |               | ABR            | 0.001089631              | 1.39E-08    | 0.00048891              | 2.69E-05   |

|             |       |           |   |            |          |         |         |               |             |          |             |            |
|-------------|-------|-----------|---|------------|----------|---------|---------|---------------|-------------|----------|-------------|------------|
| cg12494528  | chr4  | 871567    | - | NA         | NA       | Island  |         |               | 0.001085095 | 7.17E-09 | 0.000404593 | 0.0003455  |
| cg24152776  | chr6  | 89200366  | + | NA         | NA       | OpenSea |         |               | 0.001084621 | 6.97E-08 | 0.000202363 | 0.0934705  |
| cg00988841  | chr10 | 134556463 | - | NA         | NA       | S_Shore | 3'UTR   | INPP5A        | 0.00108343  | 3.78E-08 | 0.000122416 | 0.29868246 |
| cg00047815  | chr22 | 45311501  | + | NA         | NA       | N_Shore |         |               | 0.001074786 | 6.51E-08 | 0.000463365 | 0.00012268 |
| cg13578948  | chr6  | 30158801  | + | NA         | NA       | OpenSea |         | TRIM26        | 0.00107213  | 5.68E-08 | 0.000639673 | 1.34E-07   |
| cg01809779  | chr2  | 60385311  | - | NA         | NA       | OpenSea |         |               | 0.001071813 | 9.67E-10 | 0.000546812 | 2.96E-07   |
| cg010101413 | chr8  | 144668641 | + | NA         | NA       | OpenSea |         | EEF1D         | 0.001062496 | 3.46E-08 | 0.000527666 | 6.88E-06   |
| cg19452754  | chr3  | 58487342  | - | NA         | NA       | OpenSea |         |               | 0.001055596 | 9.28E-08 | 0.000458067 | 0.00013521 |
| cg23946462  | chr11 | 890331    | - | NA         | NA       | Island  | 3'UTR   | CHID1         | 0.001053801 | 8.67E-08 | 0.000267811 | 0.02368828 |
| cg24219943  | chr13 | 113409087 | + | NA         | NA       | N_Shore | TSS200  | ATP11A        | 0.001051756 | 2.58E-08 | 0.00056083  | 1.17E-06   |
| cg13952769  | chr9  | 134079861 | + | NA         | NA       | OpenSea | 3'UTR   | NUP214        | 0.001051452 | 2.83E-08 | 0.000324855 | 0.00436897 |
| cg05052384  | chr1  | 155920254 | - | NA         | NA       | N_Shore | ExonBnd | ARHGEF2       | 0.001049649 | 9.11E-08 | 0.000596576 | 7.21E-07   |
| cg18744234  | chr6  | 35422526  | - | NA         | NA       | S_Shore |         |               | 0.001046442 | 4.28E-08 | 0.000421941 | 0.00026276 |
| cg04367958  | chr16 | 11371350  | + | NA         | NA       | S_Shore | TSS1500 | PRM2          | 0.001045652 | 7.85E-08 | 0.000372814 | 0.00152605 |
| cg24493890  | chr7  | 144134664 | - | rs9648813  | 0.260331 | OpenSea |         |               | 0.001038151 | 5.53E-08 | 0.000318174 | 0.00569507 |
| cg09882283  | chr7  | 158886269 | - | NA         | NA       | N_Shore |         |               | 0.001034577 | 9.20E-08 | 0.000426365 | 0.00028125 |
| cg00136852  | chr3  | 188350489 | - | NA         | NA       | OpenSea | 5'UTR   | LPP           | 0.001032173 | 9.41E-08 | 0.00027876  | 0.01659627 |
| cg18303466  | chr1  | 27482392  | - | NA         | NA       | S_Shore | TSS1500 | SLC9A1        | 0.001031131 | 5.42E-08 | 0.000215317 | 0.05842123 |
| cg16245191  | chr10 | 14843814  | - | NA         | NA       | OpenSea |         |               | 0.001030883 | 5.27E-09 | 0.000632798 | 5.69E-09   |
| cg00879475  | chr8  | 145256251 | + | NA         | NA       | N_Shore | 3'UTR   | HEATR7A       | 0.001028677 | 3.86E-08 | 0.00049131  | 1.59E-05   |
| cg09068520  | chr17 | 3374904   | + | NA         | NA       | N_Shore | 5'UTR   | SPATA22       | 0.001024504 | 1.74E-08 | 0.000253884 | 0.01985153 |
| cg16965890  | chr8  | 48612847  | + | NA         | NA       | OpenSea | 5'UTR   | KIAA0146      | 0.00102225  | 9.83E-11 | 0.000378731 | 6.47E-05   |
| cg18492997  | chr14 | 102379372 | - | rs1618921  | 0.100663 | OpenSea | 3'UTR   | PPP2R5C       | 0.00102228  | 2.55E-08 | 0.000123296 | 0.26105595 |
| cg17326403  | chr5  | 645659    | - | NA         | NA       | N_Shore | 3'UTR   | CEP72         | 0.001021906 | 2.32E-08 | 0.000392237 | 0.00038658 |
| cg08276579  | chr5  | 9853784   | + | rs12654531 | 0.11954  | OpenSea | TSS1500 | RP11-447B18.1 | 0.001019662 | 1.84E-08 | 0.000158185 | 0.14431573 |
| cg14547519  | chr9  | 88168431  | + | NA         | NA       | OpenSea | 3'UTR   | AGTPBP1       | 0.001014089 | 2.72E-08 | 0.0001141   | 0.29535708 |
| cg08927260  | chr10 | 15254823  | + | NA         | NA       | Island  | 3'UTR   | FAM171A1      | 0.001012694 | 3.70E-08 | 0.000367287 | 0.00094442 |
| cg25344556  | chr15 | 70578982  | + | NA         | NA       | OpenSea |         |               | 0.001008657 | 1.54E-08 | 0.000428693 | 7.17E-05   |
| cg23714773  | chr7  | 808081    | - | rs4720930  | 0.23816  | Island  | TSS200  | HEATR2        | 0.001003162 | 7.86E-08 | 0.000441958 | 9.73E-05   |
| cg09343644  | chr12 | 8044199   | + | NA         | NA       | OpenSea | 5'UTR   | NANOGP1       | 0.001001844 | 6.29E-08 | 0.000503537 | 8.18E-06   |
| cg11610925  | chr10 | 134978049 | - | rs60280897 | 0.016    | Island  |         | KNDC1         | 0.001001734 | 3.36E-08 | 0.000284979 | 0.00898733 |
| cg07493324  | chr22 | 26857165  | - | NA         | NA       | OpenSea | 3'UTR   | HPS4          | 0.000999863 | 2.94E-08 | 0.000151185 | 0.16107739 |
| cg00779930  | chr7  | 135392741 | + | NA         | NA       | OpenSea | TSS200  | SLC13A4       | 0.000986816 | 3.51E-08 | 0.000363775 | 0.00076329 |
| cg26543150  | chr10 | 91043813  | + | NA         | NA       | OpenSea | 5'UTR   | LIPA          | 0.000984938 | 6.13E-08 | 0.000294268 | 0.00721489 |
| cg13765345  | chr11 | 64131561  | - | NA         | NA       | OpenSea |         | RP56KA4       | 0.000982988 | 1.14E-08 | 0.000392586 | 0.00016144 |
| cg17644611  | chr8  | 17549768  | + | NA         | NA       | OpenSea | TSS200  | MTUS1         | 0.000981358 | 6.71E-09 | 0.000186142 | 0.06563267 |
| cg10051714  | chr11 | 72326138  | + | rs75937114 | 0.023477 | OpenSea | 1stExon | MIR139        | 0.000979075 | 2.11E-08 | 0.000451415 | 2.10E-05   |
| cg05795729  | chr9  | 140725587 | - | NA         | NA       | N_Shore |         | EHMT1         | 0.00097848  | 1.10E-08 | 0.000367467 | 0.00037568 |
| cg17220632  | chr8  | 1796429   | + | NA         | NA       | N_Shore |         |               | 0.000973658 | 4.53E-08 | 0.000628995 | 1.03E-08   |
| cg18488023  | chr10 | 80472174  | - | NA         | NA       | OpenSea |         |               | 0.000972518 | 1.34E-08 | 0.000551974 | 1.40E-07   |
| cg08716380  | chr7  | 2158479   | + | NA         | NA       | S_Shelf |         | MAD1L1        | 0.000966426 | 4.31E-08 | 0.000266838 | 0.01188281 |
| cg09076064  | chr18 | 43733643  | + | NA         | NA       | OpenSea |         |               | 0.000965505 | 7.49E-09 | 0.000287719 | 0.00411942 |
| cg00037755  | chr15 | 81467321  | - | NA         | NA       | OpenSea |         | IL16          | 0.000962033 | 2.85E-08 | 0.000467239 | 9.45E-06   |
| cg02636814  | chr1  | 39881324  | + | NA         | NA       | OpenSea | 3'UTR   | MACF1         | 0.000959423 | 6.05E-08 | 0.000230749 | 0.03007883 |
| cg13586115  | chr19 | 292887    | - | NA         | NA       | S_Shore | TSS1500 | PPAP2C        | 0.000956809 | 4.71E-08 | 0.000501616 | 2.73E-06   |
| cg16783412  | chr8  | 124658104 | - | NA         | NA       | OpenSea | 5'UTR   | CTD-2552K11.2 | 0.000955318 | 7.82E-08 | 0.000558182 | 3.15E-07   |
| cg20360928  | chr2  | 61191582  | - | NA         | NA       | OpenSea |         |               | 0.00095475  | 4.10E-08 | 0.00029571  | 0.00477    |
| cg26783622  | chr2  | 231901293 | + | NA         | NA       | N_Shore | TSS1500 | C2orf72       | 0.000954302 | 8.32E-08 | 0.000465157 | 1.79E-05   |
| cg07280194  | chr5  | 55198902  | - | NA         | NA       | OpenSea |         |               | 0.000953165 | 1.42E-08 | 0.000302391 | 0.00278263 |
| cg09706573  | chr6  | 31936247  | - | NA         | NA       | N_Shelf |         | SKIV2L        | 0.00095531  | 2.82E-08 | 0.000446504 | 1.87E-05   |
| cg02395171  | chr17 | 80858829  | - | NA         | NA       | S_Shore | 3'UTR   | TBCD          | 0.000951515 | 8.05E-08 | 0.000398647 | 0.00020895 |
| cg05362168  | chr16 | 67562128  | + | NA         | NA       | N_Shore | 3'UTR   | FAM65A        | 0.000951488 | 2.77E-09 | 0.000608945 | 6.95E-10   |
| cg20167539  | chr6  | 161995302 | - | rs73593483 | 0.025137 | OpenSea |         |               | 0.000950391 | 3.29E-09 | 0.000121063 | 0.20573154 |
| cg09781932  | chr11 | 117651301 | - | NA         | NA       | Island  | 5'UTR   | DSCAML1       | 0.000949439 | 1.33E-08 | 0.000587385 | 1.11E-08   |
| cg26837844  | chr16 | 28969861  | - | NA         | NA       | OpenSea | 3'UTR   | NFATC2IP      | 0.000946743 | 5.41E-08 | 0.000402427 | 0.00013789 |
| cg02472076  | chr16 | 57238904  | + | NA         | NA       | OpenSea | ExonBnd | RSRPY1        | 0.000945086 | 2.91E-08 | 0.000690914 | 7.27E-11   |
| cg04106964  | chr1  | 154906773 | + | NA         | NA       | N_Shelf |         |               | 0.000942737 | 3.53E-08 | 0.000511168 | 1.01E-06   |
| cg20089935  | chr12 | 133324714 | + | NA         | NA       | OpenSea | ExonBnd | ANKLE2        | 0.000940396 | 2.44E-08 | 0.000590042 | 1.33E-08   |
| cg15380704  | chr16 | 8346683   | + | rs7201961  | 0.058902 | OpenSea | TSS1500 | RP11-279017.2 | 0.00094013  | 6.26E-08 | 0.000329948 | 0.00165785 |
| cg00143969  | chr12 | 131233486 | - | NA         | NA       | OpenSea |         |               | 0.000939779 | 9.14E-08 | 0.000240701 | 0.02288088 |
| cg04136699  | chr7  | 157414339 | + | NA         | NA       | S_Shore |         |               | 0.000935852 | 1.31E-08 | 0.00053359  | 1.22E-07   |
| cg25683184  | chr12 | 132238503 | + | NA         | NA       | OpenSea |         | SFSWAP        | 0.00093563  | 7.46E-08 | 0.000471216 | 8.86E-06   |

|            |       |           |   |             |          |         |         |               |             |          |             |            |
|------------|-------|-----------|---|-------------|----------|---------|---------|---------------|-------------|----------|-------------|------------|
| cg00923230 | chr9  | 34134616  | - | NA          | NA       | Island  |         |               | 0.000934739 | 8.04E-08 | 0.000633421 | 4.18E-09   |
| cg24152353 | chr1  | 6149107   | - | NA          | NA       | OpenSea | ExonBnd | KCNAB2        | 0.000933129 | 6.74E-08 | 0.00052883  | 5.96E-07   |
| cg08591219 | chr11 | 67277910  | - | NA          | NA       | S_Shore |         |               | 0.000932961 | 1.12E-08 | 0.000278394 | 0.00455049 |
| cg02227853 | chr17 | 7283176   | + | NA          | NA       | N_Shore | TSS1500 | TNK1          | 0.000932664 | 5.37E-08 | 0.000260859 | 0.01144406 |
| cg05398940 | chr16 | 89351098  | - | NA          | NA       | N_Shore |         | ANKRD11       | 0.000932269 | 7.91E-08 | 0.000198702 | 0.05663531 |
| cg00457247 | chr11 | 107650042 | + | NA          | NA       | OpenSea | TSS200  | AP001024.1    | 0.000931863 | 8.00E-08 | 0.000516772 | 1.16E-06   |
| cg03423221 | chr7  | 148484185 | - | NA          | NA       | S_Shelf |         |               | 0.0009308   | 6.45E-08 | 0.000288041 | 0.00549384 |
| cg11391980 | chr9  | 35700112  | - | NA          | NA       | OpenSea | TSS1500 | TLN1          | 0.000925463 | 6.69E-08 | 0.000280587 | 0.00657567 |
| cg17139436 | chr11 | 1715762   | - | NA          | NA       | Island  |         |               | 0.000924627 | 9.02E-08 | 0.00051199  | 1.33E-06   |
| cg20307758 | chr22 | 37248932  | + | NA          | NA       | N_Shelf | 3'UTR   | CTA-833B7.2   | 0.000924386 | 3.92E-08 | 0.000332892 | 0.00104671 |
| cg14678336 | chr7  | 65965454  | + | NA          | NA       | OpenSea |         |               | 0.000924324 | 9.68E-08 | 6.93E-06    | 0.94673415 |
| cg24138760 | chr18 | 53141223  | - | NA          | NA       | OpenSea |         | TCF4          | 0.000923868 | 7.89E-08 | 0.000190609 | 0.06493776 |
| cg17636366 | chr6  | 139918661 | + | NA          | NA       | OpenSea |         |               | 0.00092349  | 6.79E-08 | 0.00030473  | 0.00315309 |
| cg09394127 | chr2  | 33710870  | + | NA          | NA       | OpenSea | 5'UTR   | RASGRP3       | 0.000923313 | 2.14E-09 | 0.000205743 | 0.02545944 |
| cg25710630 | chr15 | 40685225  | + | NA          | NA       | OpenSea | 3'UTR   | C15orf23      | 0.000919681 | 6.40E-08 | 0.00015386  | 0.13120931 |
| cg07385882 | chr8  | 10332268  | + | NA          | NA       | OpenSea | TSS1500 | U6            | 0.00091903  | 1.46E-08 | 0.000432355 | 1.15E-05   |
| cg18509435 | chr18 | 59157879  | - | rs35676425  | 0.01282  | OpenSea | 1stExon | CDH20         | 0.000918001 | 8.71E-08 | 0.000196858 | 0.05597899 |
| cg10941835 | chr20 | 50419348  | + | rs6021451   | 0.184612 | S_Shore | TSS1500 | SALL4         | 0.000917748 | 7.47E-08 | 0.000566166 | 6.93E-08   |
| cg05753257 | chr12 | 48746532  | - | NA          | NA       | S_Shore | 5'UTR   | ZNF641        | 0.000912756 | 8.09E-08 | 0.000552312 | 1.28E-07   |
| cg02832460 | chr9  | 109557004 | + | NA          | NA       | OpenSea |         |               | 0.00091224  | 5.38E-08 | 0.000401647 | 7.97E-05   |
| cg09293533 | chr14 | 89628886  | - | NA          | NA       | Island  |         |               | 0.000911952 | 6.66E-08 | 0.000217365 | 0.03214165 |
| cg20752472 | chr5  | 14710734  | - | NA          | NA       | OpenSea | 3'UTR   | ANKH          | 0.000907997 | 4.15E-08 | 0.000442633 | 1.13E-05   |
| cg16438525 | chr3  | 52517742  | - | NA          | NA       | N_Shelf |         | NISCH         | 0.000906285 | 8.87E-08 | 0.000272039 | 0.00770931 |
| cg16068780 | chr12 | 123835423 | + | NA          | NA       | OpenSea | TSS1500 | SBNO1         | 0.000905973 | 9.25E-08 | 0.000202273 | 0.04714454 |
| cg13822122 | chr21 | 47849174  | - | rs60747009  | 0.018756 | Island  | 5'UTR   | PCNT          | 0.000903734 | 9.58E-08 | 0.000557457 | 8.92E-08   |
| cg24269863 | chr2  | 240227434 | - | NA          | NA       | OpenSea | 3'UTR   | MTERFD2       | 0.000902578 | 8.84E-08 | 0.000633344 | 1.43E-09   |
| cg24451257 | chr1  | 202208088 | - | NA          | NA       | OpenSea |         |               | 0.000900064 | 9.63E-08 | 0.000518205 | 5.51E-07   |
| cg16243832 | chr7  | 129593276 | + | NA          | NA       | S_Shore | TSS1500 | UBE2H         | 0.000899116 | 3.32E-08 | 0.00023662  | 0.015513   |
| cg05264881 | chr1  | 15375148  | - | rs140940258 | 0.0389   | Island  |         | KAZN          | 0.000899085 | 8.30E-08 | 0.000386289 | 0.00014702 |
| cg12110395 | chr19 | 37961441  | + | rs190178351 | 0.0137   | S_Shore | TSS1500 | ZNF570        | 0.000896256 | 7.20E-08 | 0.000270059 | 0.00705365 |
| cg06741485 | chr16 | 8348317   | + | NA          | NA       | OpenSea | TSS200  | RP11-279017.1 | 0.000894739 | 3.38E-08 | 0.000289576 | 0.00301638 |
| cg06868200 | chr17 | 78574320  | - | NA          | NA       | OpenSea | 5'UTR   | RPTOR         | 0.000894359 | 8.73E-08 | 0.000277352 | 0.00590177 |
| cg09971674 | chr15 | 58853142  | - | rs3829461   | 0.065556 | OpenSea |         | LIPC          | 0.000894029 | 7.21E-08 | 0.00024398  | 0.01456011 |
| cg14755147 | chr13 | 30984186  | + | NA          | NA       | S_Shore |         |               | 0.000890712 | 5.19E-09 | 0.000205709 | 0.02410352 |
| cg11986310 | chr11 | 65728298  | + | rs141299262 | 0.0101   | OpenSea | TSS1500 | SART1         | 0.000888918 | 5.69E-08 | 0.000521727 | 2.09E-07   |
| cg18093273 | chr2  | 64819126  | - | NA          | NA       | OpenSea |         | AFTPH         | 0.000885851 | 9.57E-09 | 0.000455089 | 1.32E-06   |
| cg20840031 | chr12 | 32828771  | + | NA          | NA       | N_Shelf |         |               | 0.000884427 | 1.32E-08 | 0.000333905 | 0.00037761 |
| cg15587959 | chr2  | 175422818 | + | rs9287977   | 0.197257 | OpenSea | TSS200  | U6            | 0.000881787 | 2.29E-08 | 0.000392796 | 4.07E-05   |
| cg03442090 | chr18 | 12759835  | + | NA          | NA       | OpenSea | TSS1500 | Y_RNA         | 0.000881673 | 5.02E-09 | 0.000194367 | 0.03108352 |
| cg02747703 | chr4  | 122173992 | + | NA          | NA       | OpenSea |         |               | 0.000880907 | 7.02E-08 | 0.00021313  | 0.02995465 |
| cg10649044 | chr3  | 112974528 | + | rs1499898   | 0.066808 | OpenSea |         | BOC           | 0.000880451 | 7.86E-08 | 0.00026337  | 0.00765778 |
| cg24311952 | chr8  | 2044114   | + | NA          | NA       | N_Shelf |         |               | 0.000879974 | 3.64E-08 | 0.000558265 | 1.44E-08   |
| cg18089274 | chr8  | 38677241  | + | NA          | NA       | OpenSea | TSS1500 | TACC1         | 0.000879219 | 8.24E-08 | 0.000397441 | 6.64E-05   |
| cg27584146 | chr1  | 46599915  | - | NA          | NA       | S_Shore | TSS1500 | PIK3R3        | 0.000878983 | 2.07E-08 | 0.000240072 | 0.01078021 |
| cg09181437 | chr20 | 30670099  | + | NA          | NA       | OpenSea |         | HCK           | 0.000878115 | 2.68E-08 | 0.000249638 | 0.00852788 |
| cg15886966 | chr11 | 36252345  | + | rs7113618   | 0.033903 | OpenSea | 3'UTR   | LDLRAD3       | 0.000877842 | 4.60E-08 | 0.00045704  | 3.12E-06   |
| cg17947181 | chr3  | 150967900 | - | rs3846072   | 0.499206 | OpenSea | TSS1500 | P2RY14        | 0.000875264 | 4.81E-09 | 0.000139909 | 0.11673414 |
| cg01743763 | chr15 | 50718992  | - | rs28366846  | 0.047489 | S_Shelf | 5'UTR   | USP8          | 0.00087489  | 1.57E-08 | 0.000446542 | 2.20E-06   |
| cg23235736 | chr2  | 169699910 | + | NA          | NA       | OpenSea |         | NOSTRIN       | 0.000874312 | 4.30E-09 | 0.00027121  | 0.00240804 |
| cg04788396 | chr11 | 6526878   | + | NA          | NA       | OpenSea |         | FXC1          | 0.000873052 | 8.91E-09 | 0.000221766 | 0.01478532 |
| cg06039049 | chr8  | 125286746 | + | NA          | NA       | OpenSea | 5'UTR   | RP11-383J24.1 | 0.000872545 | 9.56E-09 | 0.000339097 | 0.00022115 |
| cg02399458 | chr12 | 3209481   | - | NA          | NA       | OpenSea | 5'UTR   | TSPAN9        | 0.000871704 | 7.60E-08 | 0.000454372 | 4.43E-06   |
| cg12751588 | chr19 | 17529143  | - | NA          | NA       | N_Shore | TSS1500 | FAM125A       | 0.000871293 | 7.69E-08 | 0.00039061  | 7.29E-05   |
| cg23491344 | chr16 | 48455243  | - | NA          | NA       | OpenSea | TSS200  | SIAH1         | 0.000871072 | 3.20E-08 | 0.000444137 | 3.76E-06   |
| cg00882322 | chr19 | 12242840  | - | NA          | NA       | OpenSea | 3'UTR   | ZNF20         | 0.000870684 | 2.81E-08 | 0.000441    | 3.95E-06   |
| cg24319651 | chr12 | 7281343   | - | rs10963     | 0.177296 | OpenSea | TSS1500 | CLSTN3        | 0.000867396 | 8.81E-08 | 0.000361809 | 0.0002327  |
| cg16145995 | chr20 | 6105524   | + | NA          | NA       | S_Shore | TSS1500 | FERMT1        | 0.000866505 | 9.43E-08 | 0.000437307 | 1.00E-05   |
| cg06625578 | chr3  | 38569202  | - | NA          | NA       | OpenSea |         | EXO           | 0.000865424 | 4.72E-08 | 0.000424175 | 1.10E-05   |
| cg06541981 | chr4  | 503606    | - | NA          | NA       | OpenSea |         | PIGG          | 0.000860708 | 7.20E-08 | 0.000539678 | 4.18E-08   |
| cg12098919 | chr1  | 231010563 | - | NA          | NA       | OpenSea | TSS200  | RP5-858B6.3   | 0.000858938 | 6.47E-08 | 0.000279659 | 0.00351481 |
| cg17330652 | chr1  | 173886454 | - | NA          | NA       | OpenSea | 1stExon | SERPINC1      | 0.000857241 | 7.76E-08 | 0.000415149 | 1.93E-05   |
| cg17003250 | chr1  | 171313713 | + | rs7518648   | 0.378698 | OpenSea |         |               | 0.000856613 | 9.15E-09 | 0.000405399 | 7.60E-06   |

|            |       |             |             |          |         |         |               |             |          |             |            |
|------------|-------|-------------|-------------|----------|---------|---------|---------------|-------------|----------|-------------|------------|
| cg22127385 | chr21 | 32497166 -  | NA          | NA       | OpenSea | 3'UTR   | TIAM1         | 0.000856324 | 6.01E-08 | 0.000427265 | 9.17E-06   |
| cg21975566 | chr11 | 27462494 +  | NA          | NA       | OpenSea |         |               | 0.000850129 | 6.13E-08 | 0.000502492 | 1.86E-07   |
| cg24894383 | chr16 | 84454214 -  | rs75743984  | 0.013901 | OpenSea | 5'UTR   | ATP2C2        | 0.000847739 | 6.79E-08 | 0.000440121 | 4.44E-06   |
| cg27272573 | chr6  | 157479689 - | rs143941577 | 0.0302   | OpenSea | 5'UTR   | ARID1B        | 0.000847158 | 1.38E-08 | 0.000153167 | 0.08617145 |
| cg09915377 | chr7  | 97821499 +  | NA          | NA       | N_Shore |         |               | 0.000846528 | 2.79E-08 | 0.000307091 | 0.00084226 |
| cg18874458 | chr9  | 113008858 + | NA          | NA       | OpenSea | TSS1500 | TXN           | 0.000845588 | 9.12E-08 | 0.000314754 | 0.001005   |
| cg16656232 | chr5  | 167543888 + | NA          | NA       | OpenSea | 3'UTR   | CTB-178M22.1  | 0.000844467 | 4.45E-08 | 0.000269124 | 0.00379817 |
| cg16090375 | chr4  | 170913579 + | NA          | NA       | OpenSea | 5'UTR   | MFAP3L        | 0.000843959 | 9.82E-08 | 0.000329837 | 0.00057997 |
| cg22995486 | chr5  | 75592299 +  | NA          | NA       | OpenSea | 3'UTR   | RP11-466P24.6 | 0.00084388  | 5.89E-08 | 0.000243599 | 0.00930444 |
| cg00260680 | chr21 | 38641729 +  | NA          | NA       | S_Shore | TSS1500 | DSCR3         | 0.00084214  | 7.50E-08 | 0.000633905 | 8.30E-11   |
| cg00967637 | chr2  | 74875932 -  | rs10175000  | 0.085246 | S_Shore | TSS1500 | C2orf65       | 0.000841513 | 4.30E-08 | 0.000134243 | 0.14445439 |
| cg27599856 | chr8  | 130527590 - | rs56924935  | 0.064044 | OpenSea | 3'UTR   | CCDC26        | 0.000841382 | 2.63E-09 | 0.000274154 | 0.00123466 |
| cg08037129 | chr8  | 10290804 +  | NA          | NA       | OpenSea | TSS1500 |               | 0.000838923 | 2.75E-08 | 0.00044655  | 1.28E-06   |
| cg17459721 | chr16 | 28840005 -  | NA          | NA       | OpenSea |         | ATXN2L        | 0.000834013 | 2.87E-08 | 0.000318929 | 0.00044521 |
| cg04670832 | chr14 | 55305927 +  | NA          | NA       | OpenSea |         |               | 0.000833143 | 2.57E-08 | 0.000263106 | 0.00348248 |
| cg26741235 | chr16 | 24966242 +  | NA          | NA       | OpenSea | 3'UTR   | ARHGAP17      | 0.000832729 | 6.65E-08 | 0.000406284 | 1.52E-05   |
| cg07132187 | chr10 | 130300318 + | NA          | NA       | S_Shore |         |               | 0.000832198 | 5.33E-08 | 0.000366877 | 7.77E-05   |
| cg02729261 | chr4  | 52713308 +  | NA          | NA       | S_Shelf | 5'UTR   | DCUN1D4       | 0.000829306 | 3.01E-08 | 0.000434375 | 1.99E-06   |
| cg11141763 | chr1  | 11191762 -  | NA          | NA       | OpenSea | TSS200  | MTOR          | 0.000828218 | 3.26E-08 | 0.00039423  | 1.52E-05   |
| cg26174326 | chr6  | 26016674 +  | NA          | NA       | N_Shelf |         |               | 0.000828041 | 4.48E-08 | 0.000323962 | 0.00040268 |
| cg07441608 | chr11 | 44806970 -  | rs142716563 | 0.011    | OpenSea | 5'UTR   | TSPAN18       | 0.000825427 | 8.09E-08 | 0.000370658 | 7.31E-05   |
| cg13204462 | chr1  | 154716855 + | rs78651737  | 0.02699  | OpenSea |         |               | 0.00082459  | 7.98E-08 | 0.00047364  | 4.95E-07   |
| cg20238467 | chr17 | 38062383 +  | NA          | NA       | OpenSea | 3'UTR   | GSDMB         | 0.000824119 | 4.49E-08 | 0.000530484 | 1.14E-08   |
| cg18802393 | chr15 | 60371835 -  | rs2623797   | 0.05492  | OpenSea | 3'UTR   |               | 0.000824102 | 7.41E-08 | 0.000534127 | 1.59E-08   |
| cg11640384 | chr11 | 93419212 -  | NA          | NA       | OpenSea | 5'UTR   | KIAA1731      | 0.000823151 | 6.10E-08 | 0.000259308 | 0.0046377  |
| cg20157279 | chr19 | 4678785 +   | NA          | NA       | S_Shelf | TSS1500 | AC005594.1    | 0.000822257 | 2.57E-08 | 0.000402451 | 7.55E-06   |
| cg22483213 | chr15 | 95019591 -  | NA          | NA       | OpenSea | TSS200  | MCTP2         | 0.000815031 | 7.49E-08 | 0.000358601 | 9.68E-05   |
| cg12120430 | chr3  | 187935971 - | NA          | NA       | OpenSea | 5'UTR   | LPP           | 0.000811849 | 6.31E-08 | 0.000266859 | 0.00319139 |
| cg08115239 | chr2  | 113539246 - | rs20540     | 0.020469 | OpenSea |         |               | 0.000811382 | 2.31E-08 | 0.000271289 | 0.00193051 |
| cg21791725 | chr12 | 120222364 + | NA          | NA       | OpenSea | TSS200  | CIT           | 0.000810472 | 5.89E-08 | 0.000588156 | 2.48E-10   |
| cg08459430 | chr5  | 81571289 -  | NA          | NA       | N_Shelf | 3'UTR   | RPS23         | 0.000809837 | 9.10E-08 | 0.000357993 | 0.00010019 |
| cg17076795 | chr1  | 49244849 -  | NA          | NA       | S_Shelf | TSS1500 | BEND5         | 0.000809124 | 5.54E-08 | 0.000406609 | 7.51E-06   |
| cg19187191 | chr8  | 28420409 -  | NA          | NA       | OpenSea | TSS200  | FZD3          | 0.000803875 | 2.95E-08 | 0.000478605 | 7.67E-08   |
| cg13492553 | chr16 | 78626007 -  | NA          | NA       | OpenSea |         | WWOX          | 0.000802515 | 1.33E-08 | 0.000263027 | 0.00196848 |
| cg26646207 | chr13 | 112610299 + | NA          | NA       | N_Shore |         |               | 0.000799105 | 8.22E-08 | 0.000428805 | 2.51E-06   |
| cg06666281 | chr3  | 119305506 + | NA          | NA       | OpenSea | 5'UTR   | ADPRH         | 0.000796301 | 8.12E-08 | 0.000316625 | 0.00042723 |
| cg01736164 | chr14 | 97924317 +  | NA          | NA       | OpenSea | TSS1500 | CTD-250G14.1  | 0.000795921 | 9.25E-08 | 0.000313799 | 0.00050582 |
| cg24794298 | chr3  | 187992556 - | NA          | NA       | OpenSea | 5'UTR   | LPP           | 0.000794079 | 4.40E-08 | 0.000248475 | 0.00445555 |
| cg11146845 | chr22 | 43381327 +  | NA          | NA       | OpenSea | 5'UTR   | PACIN2        | 0.000793519 | 9.16E-08 | 0.000525313 | 1.04E-08   |
| cg10051381 | chr14 | 102476275 + | NA          | NA       | OpenSea |         |               | 0.000784115 | 4.11E-08 | 0.000359994 | 3.39E-05   |
| cg15194328 | chr9  | 110195642 + | NA          | NA       | OpenSea |         |               | 0.00078131  | 6.25E-08 | 0.00038277  | 1.34E-05   |
| cg00053361 | chr8  | 127250180 + | rs16901213  | 0.019259 | OpenSea |         |               | 0.000779133 | 4.93E-08 | 0.000166084 | 0.05262281 |
| cg11509704 | chr10 | 104562295 - | NA          | NA       | OpenSea | TSS1500 | U6            | 0.000775018 | 4.19E-08 | 0.000480308 | 3.39E-08   |
| cg00781839 | chr13 | 114127083 + | NA          | NA       | OpenSea | 5'UTR   | DCUN1D2       | 0.000770598 | 8.10E-08 | 0.000305689 | 0.00043988 |
| cg14005716 | chr20 | 4680843 -   | NA          | NA       | OpenSea | 3'UTR   | PRNP          | 0.000764565 | 6.92E-08 | 0.000472524 | 6.09E-08   |
| cg04660401 | chr21 | 45969319 +  | NA          | NA       | OpenSea |         |               | 0.000762224 | 2.17E-08 | 0.000447227 | 8.66E-08   |
| cg13799782 | chr1  | 32635542 -  | NA          | NA       | OpenSea | TSS1500 | KPNA6         | 0.000758677 | 8.84E-08 | 0.000352831 | 4.31E-05   |
| cg01121969 | chr1  | 164533042 + | rs12040395  | 0.081271 | OpenSea |         | PBX1          | 0.000754031 | 5.80E-08 | 0.000370617 | 1.20E-05   |
| cg05628656 | chr3  | 10021286 +  | NA          | NA       | OpenSea | TSS1500 | TMEM111       | 0.00074917  | 6.27E-08 | 0.000276248 | 0.00096148 |
| cg08561530 | chr10 | 118610187 - | NA          | NA       | S_Shore | 5'UTR   | RP11-539I5.2  | 0.000748849 | 8.07E-08 | 0.00029929  | 0.00039843 |
| cg21373880 | chr10 | 123670988 + | NA          | NA       | OpenSea | TSS1500 | ATE1          | 0.000747058 | 9.55E-08 | 0.000462828 | 7.87E-08   |
| cg05862036 | chr1  | 23689691 -  | NA          | NA       | OpenSea |         |               | 0.000724113 | 6.04E-08 | 0.000350733 | 1.63E-05   |

Rate of change expressed as % Beta units/ year. Beta Baseline and Beta Followup indicate group average methylation values in Beta units at baseline and follow-up time points respectively.
